# Supplementary material for: In situ probing the dynamic reconstruction of copper–zinc electrocatalysts for CO2 reduction
Source: Royal Society of Chemistry journal article supplement (doi:10.1039/d2nr01478e), 2022-01-01
Supplement: d2nr01478e1.pdf [file d2nr01478e1.pdf]

## Supporting Information

# ***In situ* probing dynamic reconstruction of copper-zinc electrocatalyst for CO<sub>2</sub> reduction**

Yen-Po Huang,<sup>‡a</sup> Ching-Wei Tung,<sup>‡a</sup> Tai-Lung Chen,<sup>a</sup> Chia-Shuo Hsu,<sup>a</sup> Mei-Yi Liao,<sup>\*b</sup> Hsiao-Chien Chen,<sup>\*c,d</sup> and Hao Ming Chen<sup>\*a,e</sup>

<sup>a</sup>Department of Chemistry, National Taiwan University, Taipei 106, Taiwan

<sup>b</sup>Department of Applied Chemistry, National Pingtung University, Pingtung 90003, Taiwan.

<sup>c</sup>Center for Reliability Science and Technologies, Chang Gung University, Taoyuan 33302, Taiwan

<sup>d</sup>Kidney Research Center, Department of Nephrology, Chang Gung Memorial Hospital, Linkou, Taoyuan 33305, Taiwan

<sup>e</sup>National Synchrotron Radiation Research Center, Hsinchu 300, Taiwan

<sup>‡</sup>These authors contributed equally to this work.

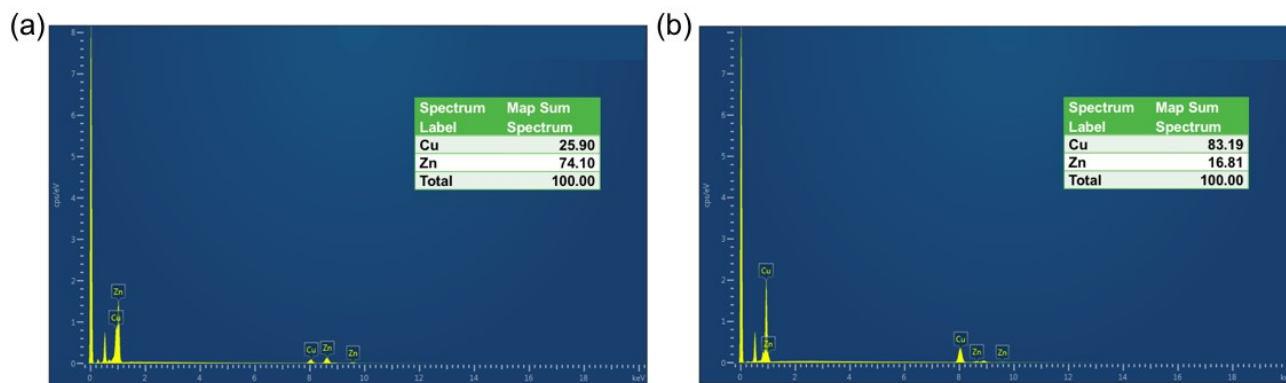

**Fig. S1** EDS spectra of (a) s-Cu<sub>1</sub>Zn<sub>3</sub>O<sub>x</sub> and (b) s-Cu<sub>5</sub>Zn<sub>1</sub>O<sub>x</sub>.

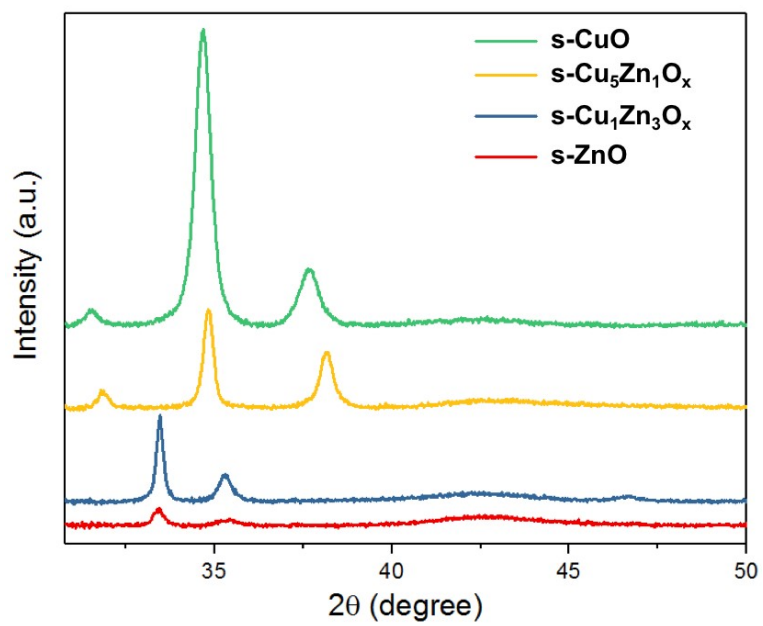

**Fig. S2** XRD spectra of s-CuO, s-Cu<sub>1</sub>Zn<sub>3</sub>O<sub>x</sub>, s-Cu<sub>5</sub>Zn<sub>1</sub>O<sub>x</sub> and s-ZnO.

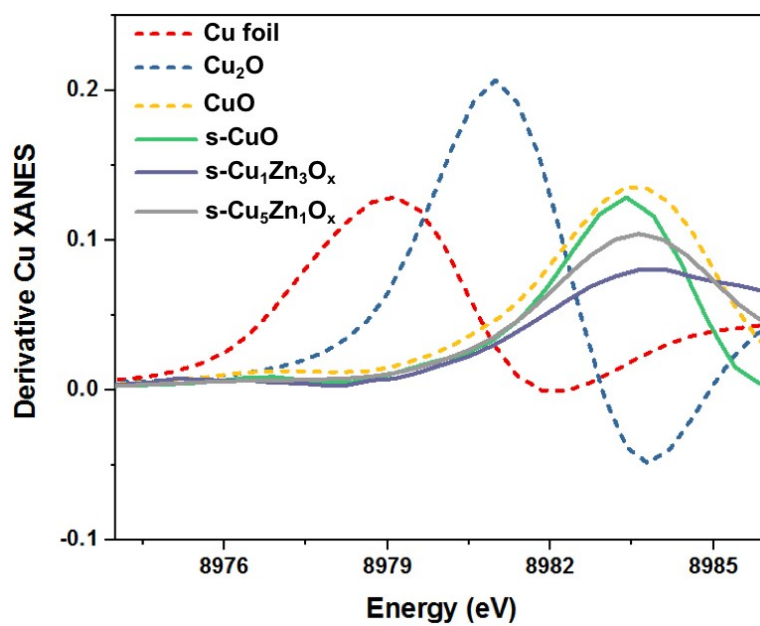

**Fig. S3** The first derivative spectra of Cu foil, Cu<sub>2</sub>O, CuO, s-CuO, s-Cu<sub>1</sub>Zn<sub>3</sub>O<sub>x</sub> and s-Cu<sub>5</sub>Zn<sub>1</sub>O<sub>x</sub> from XANES spectra of Cu K-edge.

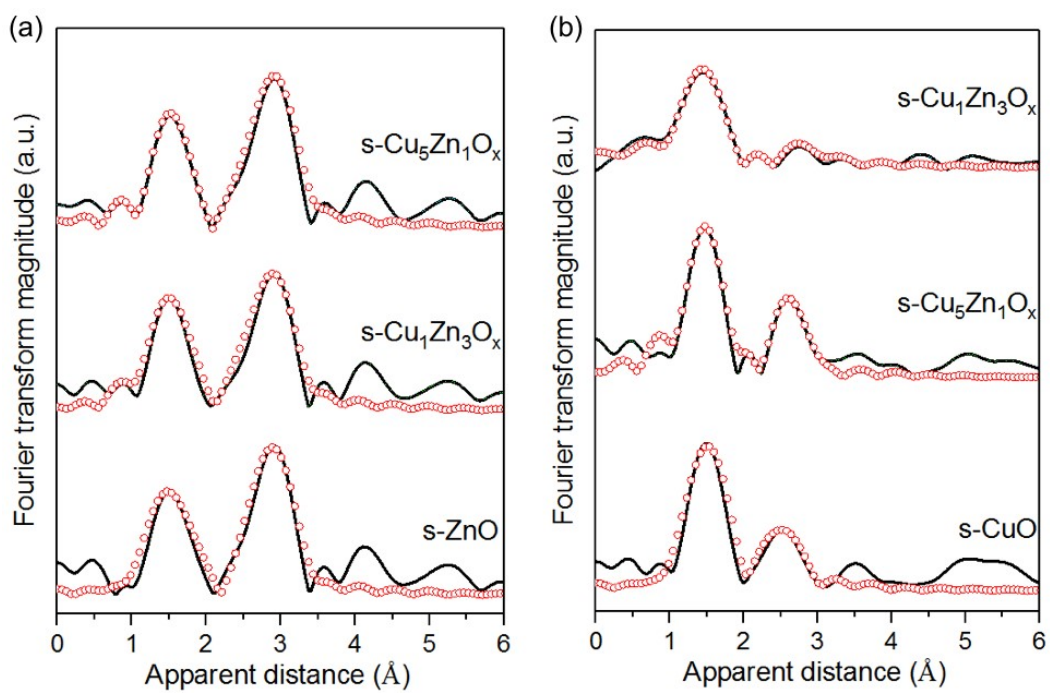

**Fig. S4** (a) Zn K-edge and (b) Cu K-edge EXAFS of the sputtered samples.

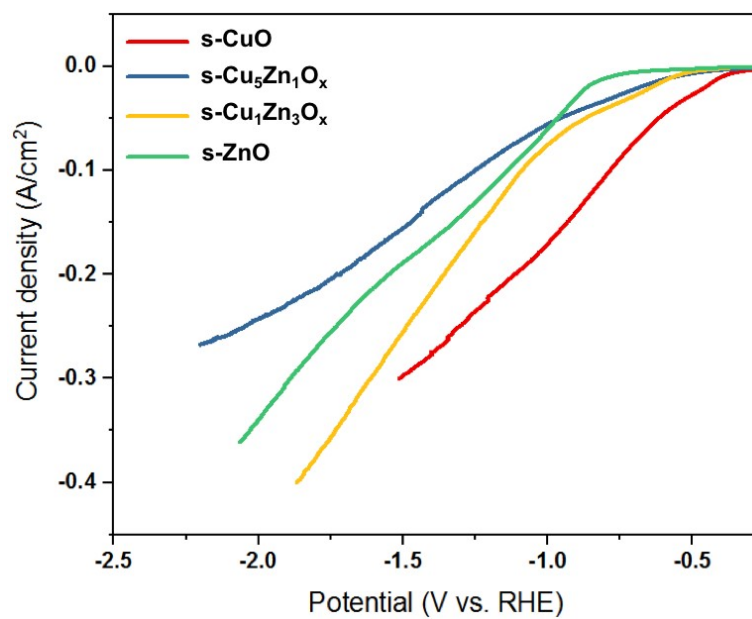

**Fig. S5** LSV curves of s-CuO, s-Cu<sub>1</sub>Zn<sub>3</sub>O<sub>x</sub>, s-Cu<sub>5</sub>Zn<sub>1</sub>O<sub>x</sub> and s-ZnO in 1.0 M KOH.

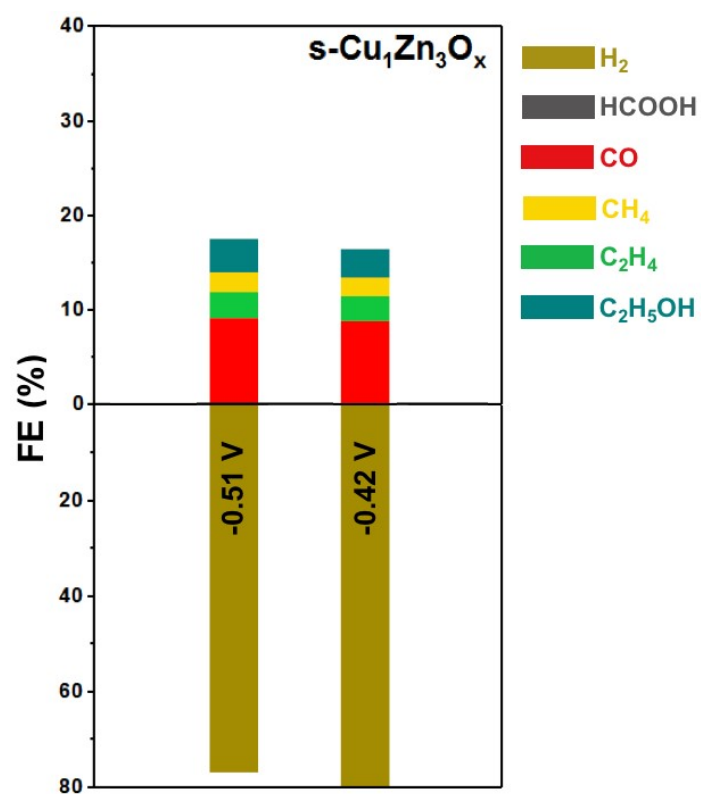

**Fig. S6** Faradaic efficiencies for formation of different products in the CO<sub>2</sub>RR with s-Cu<sub>1</sub>Zn<sub>3</sub>O<sub>x</sub>.

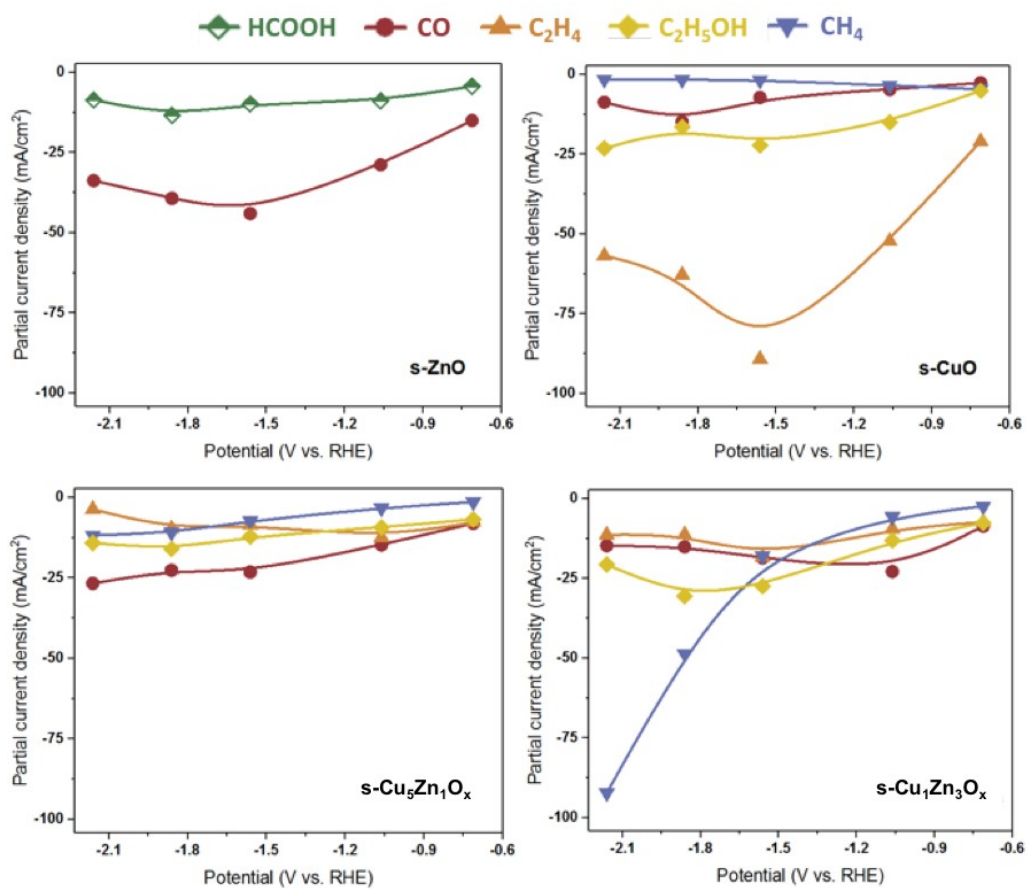

**Fig. S7** Products partial current density of s-ZnO, s-CuO, s-Cu<sub>5</sub>Zn<sub>1</sub>O<sub>x</sub> and s-Cu<sub>1</sub>Zn<sub>3</sub>O<sub>x</sub> in 1.0 M KOH.



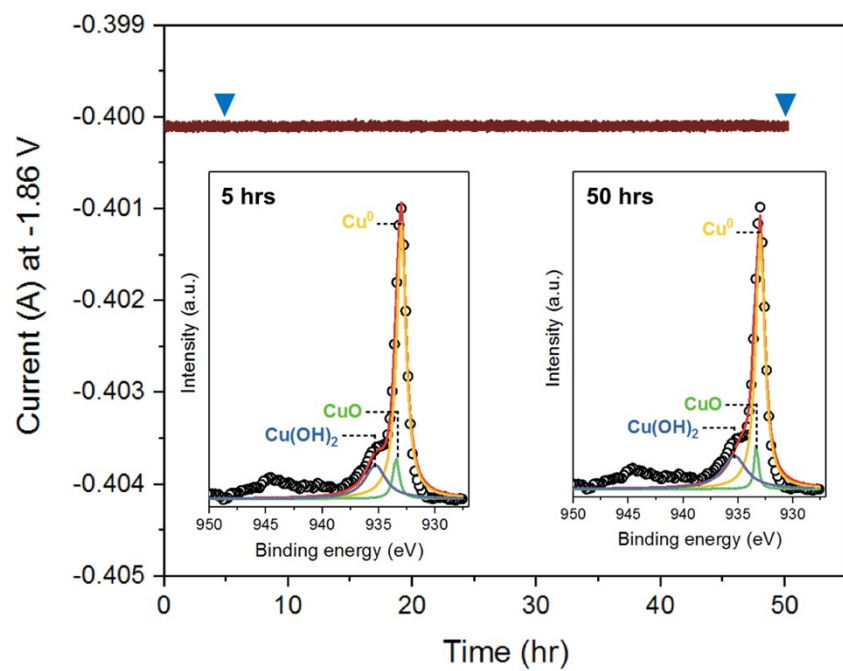

**Fig. S8** Stability test of s-Cu<sub>1</sub>Zn<sub>3</sub>O<sub>x</sub> at -1.86 V. (Inset: XPS of Cu 2p at 5 and 50 hrs.)

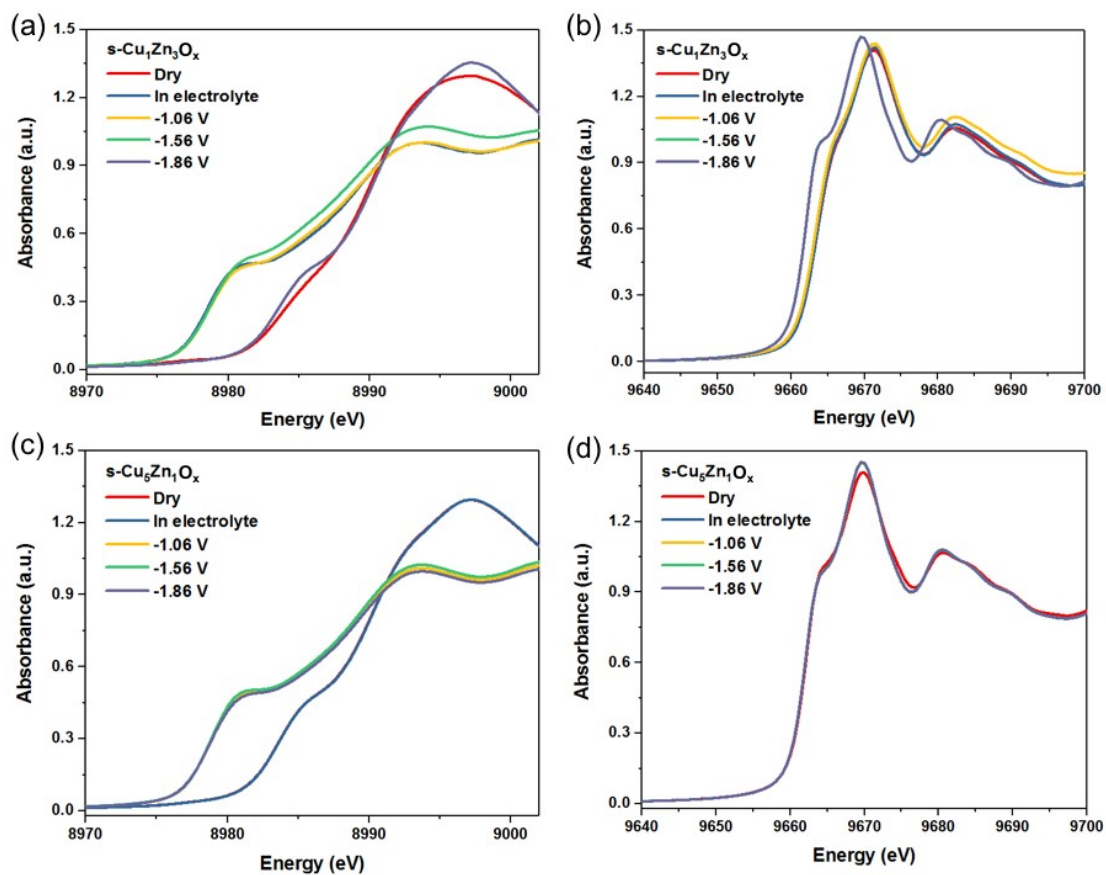

**Fig. S9** *In situ* Cu K-edge XANES of (a) s-Cu<sub>1</sub>Zn<sub>3</sub>O<sub>x</sub> and (c) s-Cu<sub>5</sub>Zn<sub>1</sub>O<sub>x</sub>. *In situ* Zn K-edge XANES of (b) s-Cu<sub>1</sub>Zn<sub>3</sub>O<sub>x</sub> and (d) s-Cu<sub>5</sub>Zn<sub>1</sub>O<sub>x</sub>.

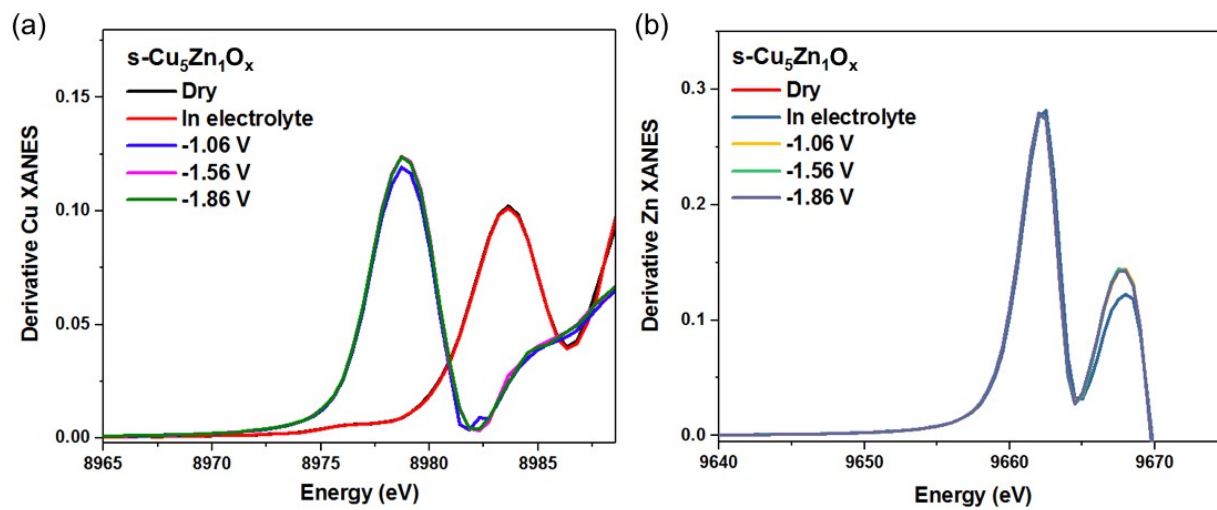

**Fig. S10** The first derivative spectra of *in situ* (a) Cu K-edge and (b) Zn K-edge XANES of  $s\text{-Cu}_5\text{Zn}_1\text{O}_x$ .

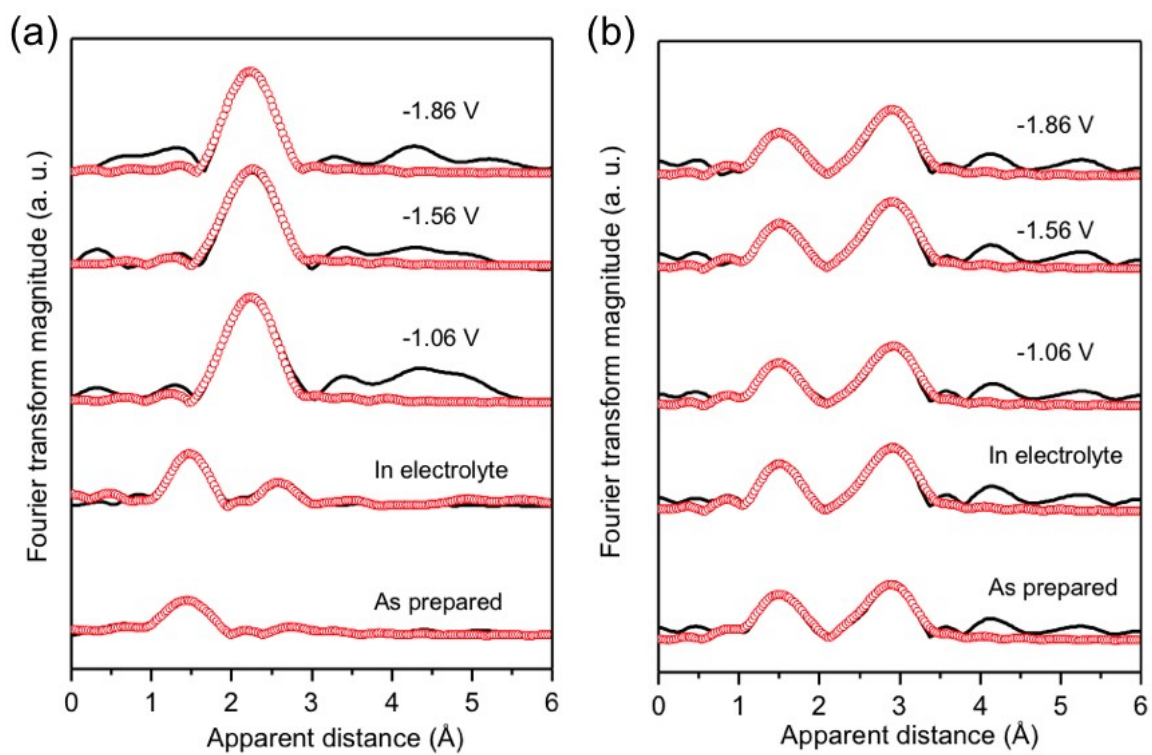

**Fig. S11** *In situ* (a) Cu K-edge and (b) Zn K-edge EXAFS of  $s\text{-Cu}_1\text{Zn}_3\text{O}_x$ .

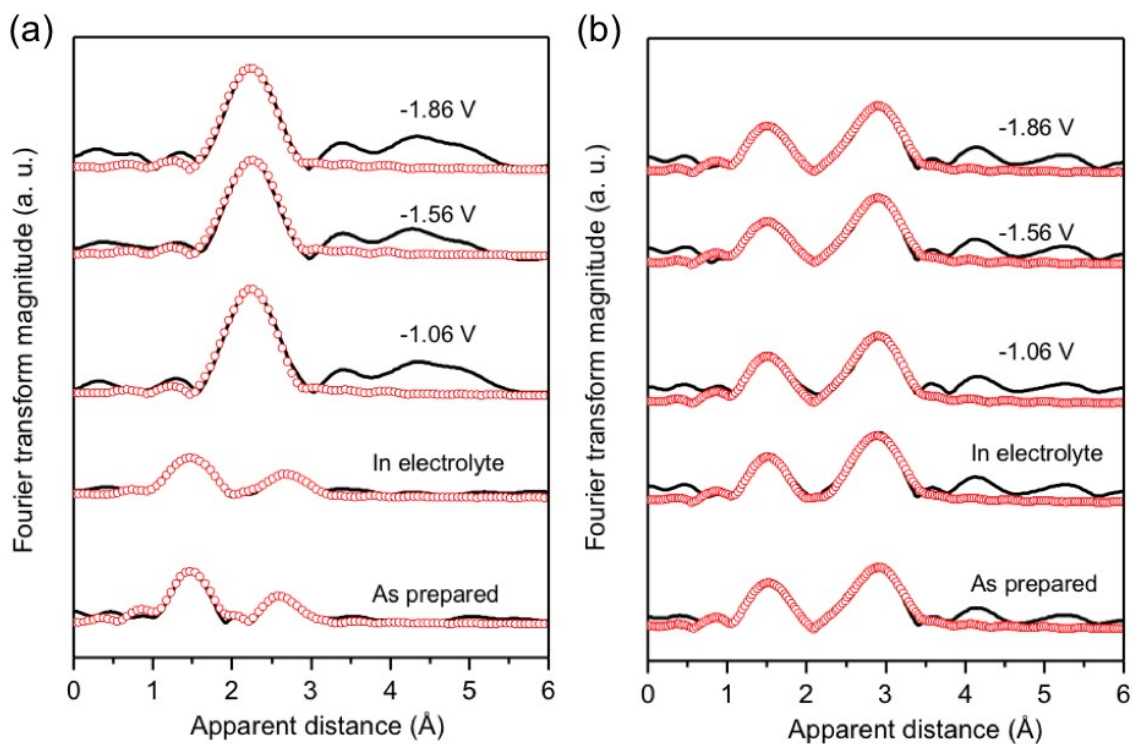

**Fig. S12** *In situ* (a) Cu K-edge and (b) Zn K-edge EXAFS of s-Cu<sub>5</sub>Zn<sub>1</sub>O<sub>x</sub>.

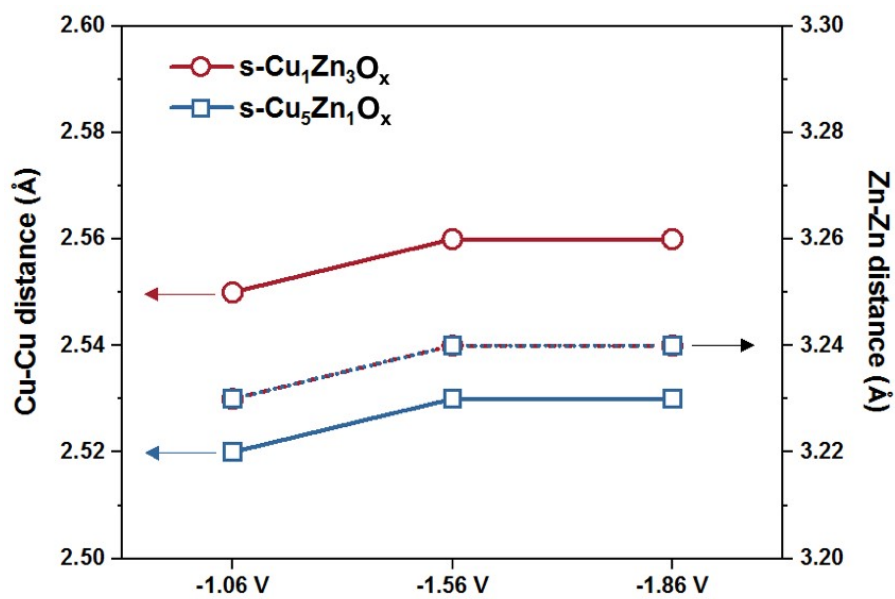

**Fig. S13** Cu-Cu and Zn-Zn bond distance as a function of potential for s-Cu<sub>1</sub>Zn<sub>3</sub> and s-Cu<sub>5</sub>Zn<sub>1</sub>O<sub>x</sub>.

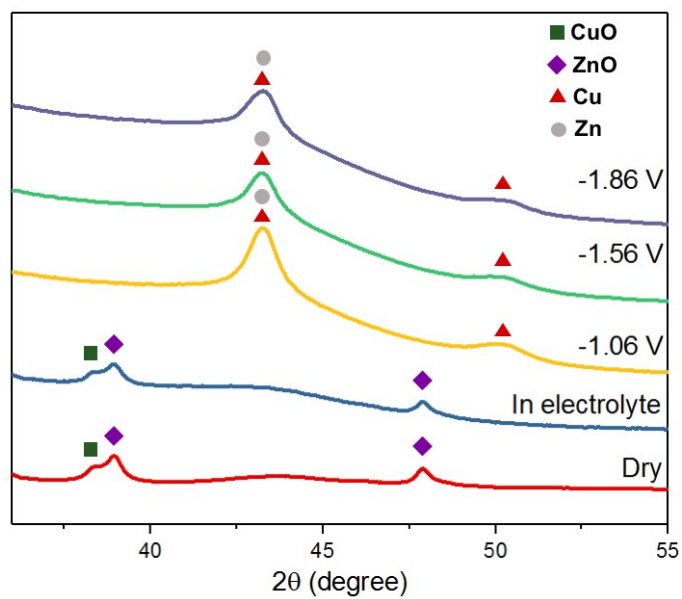

**Fig. S14** *In situ* synchrotron XRD for s-Cu<sub>1</sub>Zn<sub>3</sub>O<sub>x</sub> during CO<sub>2</sub>RR.

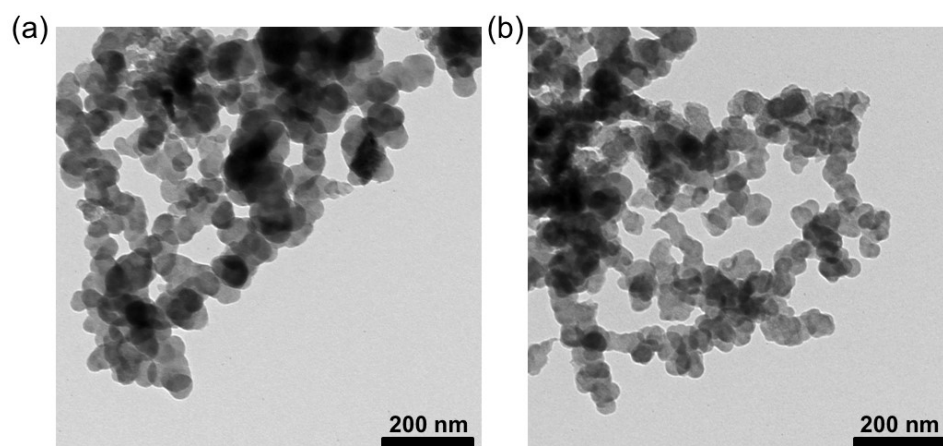

**Fig. S15** TEM images of s-Cu<sub>1</sub>Zn<sub>3</sub>O<sub>x</sub> (a) before and (b) after CO<sub>2</sub>RR at applied potential of -1.86 V.



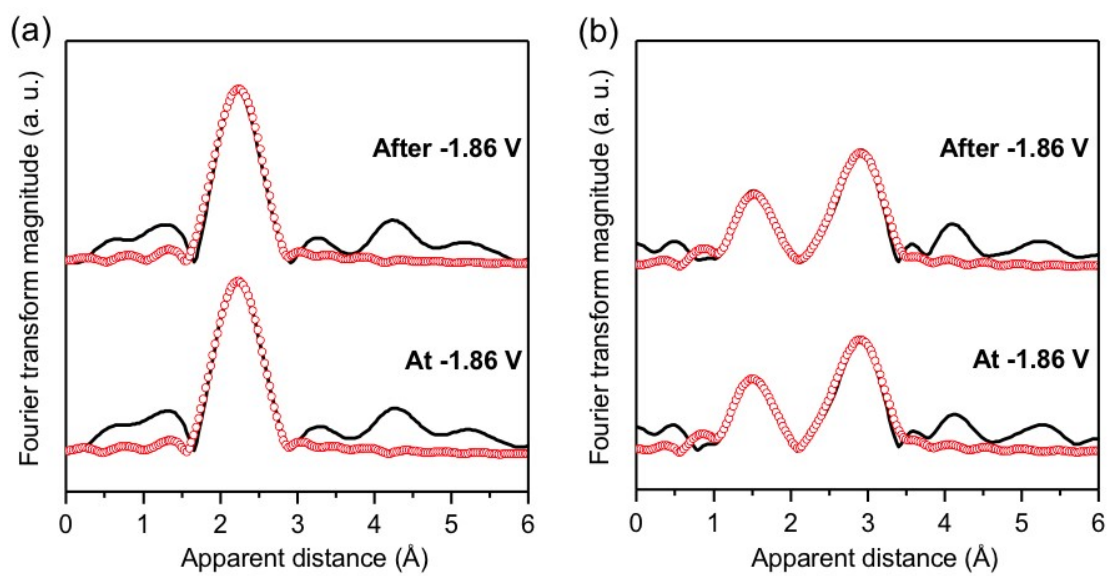

**Fig. S16** Comparison of (a) Cu K-edge and (b) Zn K-edge EXAFS of s-Cu<sub>5</sub>Zn<sub>1</sub>O<sub>x</sub> when and after -1.86 V was applied.

**Table S1.** Structural parameters extracted of s-ZnO, s-Cu<sub>1</sub>Zn<sub>3</sub>O<sub>x</sub> and s-Cu<sub>5</sub>Zn<sub>1</sub>O<sub>x</sub> from Zn K-edgeEXAFS. Fourier-transforms (FT) were performed in the k-range between 2.5 Å<sup>-1</sup> and 10 Å<sup>-1</sup>.

| <b>Condition</b>                                 | <b>Path</b> | <b>Coordination<br/>number</b> | <b>R(Å)</b> | <b>DW(Å<sup>2</sup>)</b> |
|--------------------------------------------------|-------------|--------------------------------|-------------|--------------------------|
| s-ZnO                                            | Zn-O        | 4.0(1)                         | 1.98(1)     | 0.0088(1)                |
|                                                  | Zn-Zn       | 11.8(1)                        | 3.19(2)     | 0.0084(1)                |
| s-Cu <sub>1</sub> Zn <sub>3</sub> O <sub>x</sub> | Zn-O        | 3.8(2)                         | 1.97(1)     | 0.0088(1)                |
|                                                  | Zn-Zn       | 11.1(1)                        | 3.24(2)     | 0.0084(1)                |
| s-Cu <sub>5</sub> Zn <sub>1</sub> O <sub>x</sub> | Zn-O        | 3.7(1)                         | 1.97(1)     | 0.0088(1)                |
|                                                  | Zn-Zn       | 11.0(1)                        | 3.23(2)     | 0.0084(1)                |

**Table S2.** Structural parameters extracted of s-CuO, s-Cu<sub>5</sub>Zn<sub>1</sub>O<sub>x</sub> and s-Cu<sub>1</sub>Zn<sub>3</sub>O<sub>x</sub> from Cu K-edgeEXAFS. Fourier-transforms (FT) were performed in the k-range between 2.5 Å<sup>-1</sup> and 10 Å<sup>-1</sup>.

| <b>Condition</b>                                 | <b>Path</b> | <b>Coordination<br/>number</b> | <b>R(Å)</b> | <b>DW(Å<sup>2</sup>)</b> |
|--------------------------------------------------|-------------|--------------------------------|-------------|--------------------------|
| s-CuO                                            | Cu-O        | 4.1(1)                         | 1.96(1)     | 0.0084(1)                |
|                                                  | Cu-Cu       | 11.6(2)                        | 3.23(1)     | 0.0082(1)                |
| s-Cu <sub>5</sub> Zn <sub>1</sub> O <sub>x</sub> | Cu-O        | 3.3(2)                         | 1.93(1)     | 0.0054(1)                |
|                                                  | Cu-Cu       | 2.1(2)                         | 2.97(2)     | 0.0050(1)                |
| s-Cu <sub>1</sub> Zn <sub>3</sub> O <sub>x</sub> | Cu-O        | 3.4(2)                         | 1.91(1)     | 0.0054(1)                |
|                                                  | Cu-Cu       | 1.2(2)                         | 3.03(2)     | 0.0050(1)                |

**Table S3.** Structural parameters extracted of s-Cu<sub>1</sub>Zn<sub>3</sub> from *in situ* Cu K-edge EXAFS during CO<sub>2</sub>RR.Fourier-transforms (FT) were performed in the k-range between 2.5 Å<sup>-1</sup> and 10 Å<sup>-1</sup>.

| <b>Condition</b> | <b>Path</b> | <b>Coordination<br/>number</b> | <b>R(Å)</b> | <b>DW(Å<sup>2</sup>)</b> |
|------------------|-------------|--------------------------------|-------------|--------------------------|
| As prepared      | Cu-O        | 3.4(2)                         | 1.91(1)     | 0.0054(1)                |
|                  | Cu-Cu       | 1.2(2)                         | 3.03(2)     | 0.0050(1)                |
| In electrolyte   | Cu-O        | 3.3(2)                         | 1.94(1)     | 0.0054(1)                |
|                  | Cu-Cu       | 2.3(1)                         | 2.94(2)     | 0.0050(1)                |
| -1.06 V          | Cu-Cu       | 11.9(1)                        | 2.55(1)     | 0.0106(1)                |
| -1.56 V          | Cu-Cu       | 11.3(1)                        | 2.56(1)     | 0.0106(1)                |
| -1.86 V          | Cu-Cu       | 10.9(1)                        | 2.56(1)     | 0.0106(1)                |
| After -1.86 V    | Cu-Cu       | 10.8(1)                        | 2.56(1)     | 0.0106(1)                |

R[Å]: Apparent distance

CN: Coordination number

DW: Debye-Waller parameter

**Table S4.** Structural parameters extracted of s-Cu<sub>5</sub>Zn<sub>1</sub> from *in situ* Cu K-edge EXAFS during CO<sub>2</sub>RR.

Fourier-transforms (FT) were performed in the k-range between 2.5 Å<sup>-1</sup> and 10 Å<sup>-1</sup>.

| <b>Condition</b> | <b>Path</b> | <b>Coordination<br/>number</b> | <b>R(Å)</b> | <b>DW(Å<sup>2</sup>)</b> |
|------------------|-------------|--------------------------------|-------------|--------------------------|
| As prepared      | Cu-O        | 3.3(2)                         | 1.93(1)     | 0.0054(1)                |
|                  | Cu-Cu       | 2.1(2)                         | 2.97(2)     | 0.0050(1)                |
| In electrolyte   | Cu-O        | 3.4(2)                         | 1.95(1)     | 0.0054(1)                |
|                  | Cu-Cu       | 2.2(1)                         | 2.99(1)     | 0.0050(1)                |
| -1.06 V          | Cu-Cu       | 11.9(1)                        | 2.52(1)     | 0.0106(1)                |
| -1.56 V          | Cu-Cu       | 12.0(1)                        | 2.53(1)     | 0.0106(1)                |
| -1.86 V          | Cu-Cu       | 12.1(1)                        | 2.53(1)     | 0.0106(1)                |

R[Å]: Apparent distance

CN: Coordination number

DW: Debye-Waller parameter

**Table S5.** Structural parameters extracted of s-Cu<sub>1</sub>Zn<sub>3</sub> from *in situ* Zn K-edge EXAFS during CO<sub>2</sub>RR.Fourier-transforms (FT) were performed in the k-range between 2.5 Å<sup>-1</sup> and 10 Å<sup>-1</sup>.

| Condition      | Path  | Coordination | R(Å)    | DW(Å <sup>2</sup> ) |
|----------------|-------|--------------|---------|---------------------|
|                |       | number       |         |                     |
| As prepared    | Zn-O  | 3.8(2)       | 1.97(1) | 0.0088(1)           |
|                | Zn-Zn | 11.1(1)      | 3.24(2) | 0.0084(1)           |
| In electrolyte | Zn-O  | 3.9(2)       | 1.97(1) | 0.0088(1)           |
|                | Zn-Zn | 11.3(1)      | 3.23(2) | 0.0084(1)           |
| -1.06 V        | Zn-O  | 3.7(1)       | 1.97(1) | 0.0088(1)           |
|                | Zn-Zn | 11.0(1)      | 3.23(2) | 0.0084(1)           |
| -1.56 V        | Zn-O  | 3.6(2)       | 1.97(1) | 0.0088(1)           |
|                | Zn-Zn | 10.7(1)      | 3.24(2) | 0.0084(1)           |
| -1.86 V        | Zn-O  | 3.3(2)       | 1.97(1) | 0.0088(1)           |
|                | Zn-Zn | 10.4(2)      | 3.24(2) | 0.0084(1)           |
| After -1.86 V  | Zn-O  | 3.4(2)       | 1.97(1) | 0.0088(1)           |
|                | Zn-Zn | 10.4(2)      | 3.24(2) | 0.0084(1)           |

R[Å]: Apparent distance

CN: Coordination number

DW: Debye-Waller parameter

**Table S6.** Structural parameters extracted of s-Cu<sub>5</sub>Zn<sub>1</sub> from *in situ* Zn K-edge EXAFS during CO<sub>2</sub>RR.Fourier-transforms (FT) were performed in the k-range between 2.5 Å<sup>-1</sup> and 10 Å<sup>-1</sup>.

| Condition      | Path  | Coordination | R(Å)    | DW(Å <sup>2</sup> ) |
|----------------|-------|--------------|---------|---------------------|
|                |       | number       |         |                     |
| As prepared    | Zn-O  | 3.3(1)       | 1.99(1) | 0.0088(1)           |
|                | Zn-Zn | 11.4(1)      | 3.23(2) | 0.0084(1)           |
| In electrolyte | Zn-O  | 3.8(1)       | 1.97(1) | 0.0088(1)           |
|                | Zn-Zn | 11.8(1)      | 3.23(2) | 0.0084(1)           |
| -1.06 V        | Zn-O  | 3.8(1)       | 1.97(1) | 0.0088(1)           |
|                | Zn-Zn | 11.8(1)      | 3.23(2) | 0.0084(1)           |
| -1.56 V        | Zn-O  | 4.0(2)       | 1.98(1) | 0.0088(1)           |
|                | Zn-Zn | 11.8(1)      | 3.24(2) | 0.0084(1)           |
| -1.86 V        | Zn-O  | 4.0(2)       | 1.98(1) | 0.0088(1)           |
|                | Zn-Zn | 11.8(1)      | 3.24(2) | 0.0084(1)           |

R[Å]: Apparent distance

CN: Coordination number

DW: Debye-Waller parameter
